# Supplementary material for: Labeling of Monilinia fructicola with GFP and Its Validation for Studies on Host-Pathogen Interactions in Stone and Pome Fruit
Source: MDPI journal article supplement (doi:10.3390/genes10121033), 2019-12-11
Supplement: s1 [file s1]

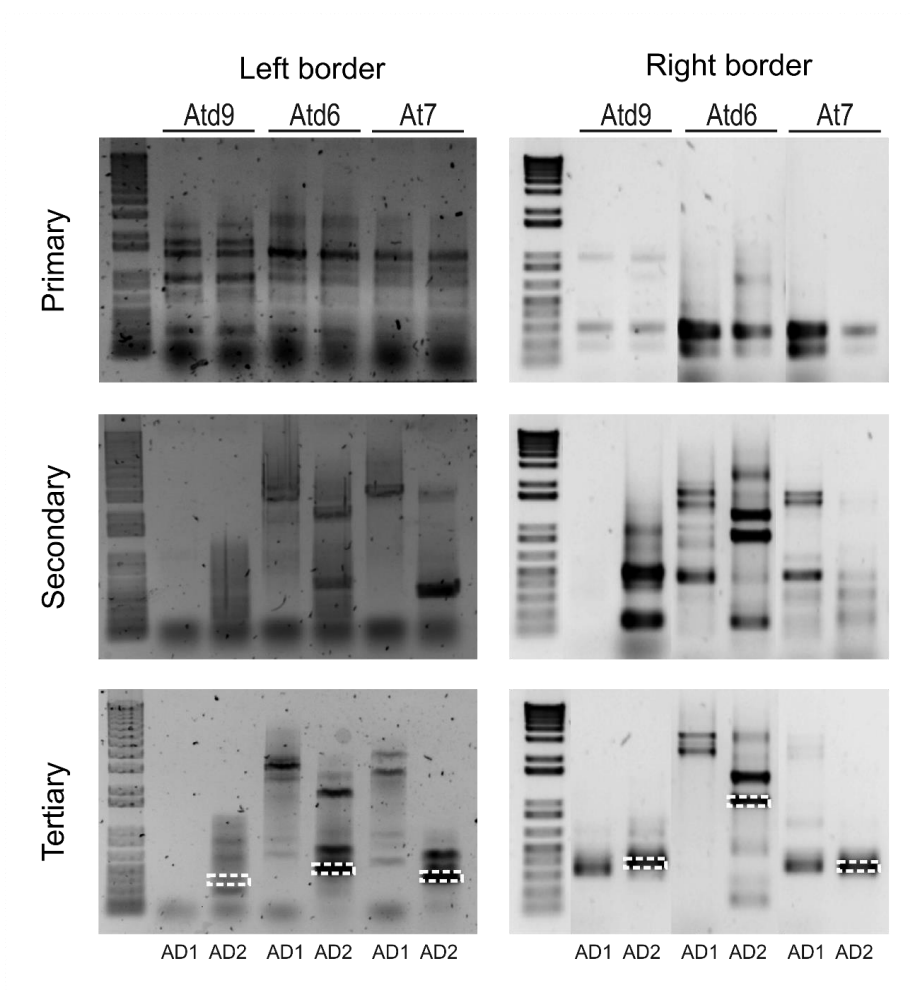

**Figure S1.** TAIL-PCR analysis of border junctions of *M. fructicola* transformants. The agarose gel analysis from top to the bottom show products of three rounds of PCR with specific primer for the left (LB1/LB2/LB3) or right (RB1/RB2/RB3) border of T-DNA and degenerate oligonucleotides (AD1/AD2) of each *M. fructicola* transformant (Atd9, Atd6 and At7). The bands surrounded by dashed squares were excised from the gel and sequenced.
