# Supplementary material for: Labeling of Monilinia fructicola with GFP and Its Validation for Studies on Host-Pathogen Interactions in Stone and Pome Fruit
Source: MDPI journal article supplement (doi:10.3390/genes10121033), 2019-12-11
Supplement: s1 [file s1]

**Table S1.** Conditions used for TAIL-PCR.

| Reaction    | Number of Cycles | Thermal settings                         |
|-------------|------------------|------------------------------------------|
| PreTAIL-PCR | x1               | 94°C 2 min                               |
|             | x15              | 94°C 30 s, 58°C 30 s, 72°C 1 min         |
| Primary     | x1               | 92°C 3 min, 95°C 2min                    |
|             | x5               | 94°C 30 s, 64°C 1min, 72°C 2min          |
|             | x1               | 94°C 30 s, 30°C ramping to 72°C in 3 min |
|             | x1               | 72°C 2 min                               |
|             | x10              | 94°C 30 s, 44°C 1min, 72°C 2min          |
|             | x15              | 94°C 30 s, 66°C 1min, 72°C 2min          |
|             | x15              | 94°C 30 s, 64°C 1min, 72°C 2min          |
|             | x15              | 94°C 30 s, 44°C 1min, 72°C 2min          |
|             | x1               | 72°C 5 min                               |
| Secondary   | x1               | 94°C 2 min                               |
|             | x30              | 94°C 10 s, 60°C 1min, 72°C 2min          |
|             | x15              | 94°C 10 s, 44°C 1min, 72°C 2min          |
|             | x1               | 72°C 5 min                               |
| Tertiary    | x1               | 94°C 2 min                               |
|             | x30              | 94°C 30 s, 42°C 1min, 72°C 2min          |
|             | x1               | 72°C 5 min                               |
