# Supplementary material for: Labeling of Monilinia fructicola with GFP and Its Validation for Studies on Host-Pathogen Interactions in Stone and Pome Fruit
Source: MDPI journal article supplement (doi:10.3390/genes10121033), 2019-12-11
Supplement: s1 [file s1]

**Table S2.** Sequence analysis of the T-DNA border junctions (left and right borders) in the *Monilinia fructicola* transformants (Atd9, Atd6, and AT7)

|                  | LEFT BORDER                                                                                                                                                                                                                            | RIGHT BORDER                                                                                                                                                                                                                   |
|------------------|----------------------------------------------------------------------------------------------------------------------------------------------------------------------------------------------------------------------------------------|--------------------------------------------------------------------------------------------------------------------------------------------------------------------------------------------------------------------------------|
| Atd9<br>(38cGFP) | gacagtctagttaaccagttgcaagatctaccgcagcccgtaagacatctcattacgcgcacgagcaga<br>aggaaaggcaaatacgaccccgtaaaagaaaaaacctgtccgagccgctgcactctcctcgtcgagctt<br>agggtcgataaatCg <b>ATATAACACCACATTTGTTTAACTGCGAATCTGTT</b><br><b>GAATTATTGTGT...</b> | ...TTTCCCGCCTTCAGTTTAACTATCAGT <u>GTTTG</u> gtcgtag<br>agtagctgagcaagaagggcgccaggattcgggaccaagtggtttggaaatccgtatag<br>ctgcgtcagtttgggtgtcccgattcacatattatataatggaggaatatcccgaggag<br>ggcacctcaagaccttgtgttaacagaactcagatcctcaa |
| Atd6             | gacgaaaactgtattttctataacttgaaccaacagtggccctaacaaaaggtctaacaaaaggttcg<br>g<br>cccccttagttattgacggatagagatggatcgtgaagtaaaggggagtgatgggcacatacaaatgg<br><u>GTCCTATATAACACCACATTTGTTTAACTGCGAATCTGTTG-</u><br><b>ATTATTGTGT...</b>         | ...TTTCCCGCCTTCAGTTTAACTATCAGTGT <u>TTGA</u> gAaaa<br>atagaccagatagtgaatggttctcgcgcaagattgtccaccgacaaggcagcttctttt<br>caacagacccttgcggccctgcataaagattgaggttgataggcactctggagggttcgat<br>gtgatgttaagctgggggaagactctaag           |
| AT7              | ccagttacaagatctaccgcagcccgtaagacatctcattacgcgcacgagtagaaggaaaggcaaatac<br>gaccccgtaaaagaaaaaacctgtccgagccgctgcactctcctcgtcgagcttaggttcgataaatCg<br><b>A-TATAACACCACATTTGTTTAACTGCGAATCTGTTG-</b><br><b>ATTATTGTGT...</b>               | ...TTTCCCGCCTTCAGTTTAACTATCAGTGT <u>TTGATGGA</u><br><u>TAT</u> gaagcaaatttagccggttgacggatgaggcttctgtagagaatactgtattgtac<br>tcaaagacgctctagatgggcttgcttcttcttagacctgtggcagatctacg                                               |

Bold uppercase letters denote nucleotides from T-DNA borders. Flanking genomic sequences are indicated by lowercase letters. Microhomologies between T-DNA and *M. fructicola* genomic sequences are underlined.
